# Supplementary material
Source: publisher figshare collection journal article supplement (https://gsapubs.figshare.com/ndownloader/files/22410333)
Supplement: Supplementary file 1 [file 22410333]

Figure S8. Summary figures of paleoseismology of Surprise Valley fault zone. A) Logs from a trench and borehole at the Cooks Canyon site and from a natural exposure at the Steamboat Canyon site (modified from Fig 4 of Personius et al., 2009). B) OxCal model of chronological data (modified from Fig. 6 of Personius et al., 2009).

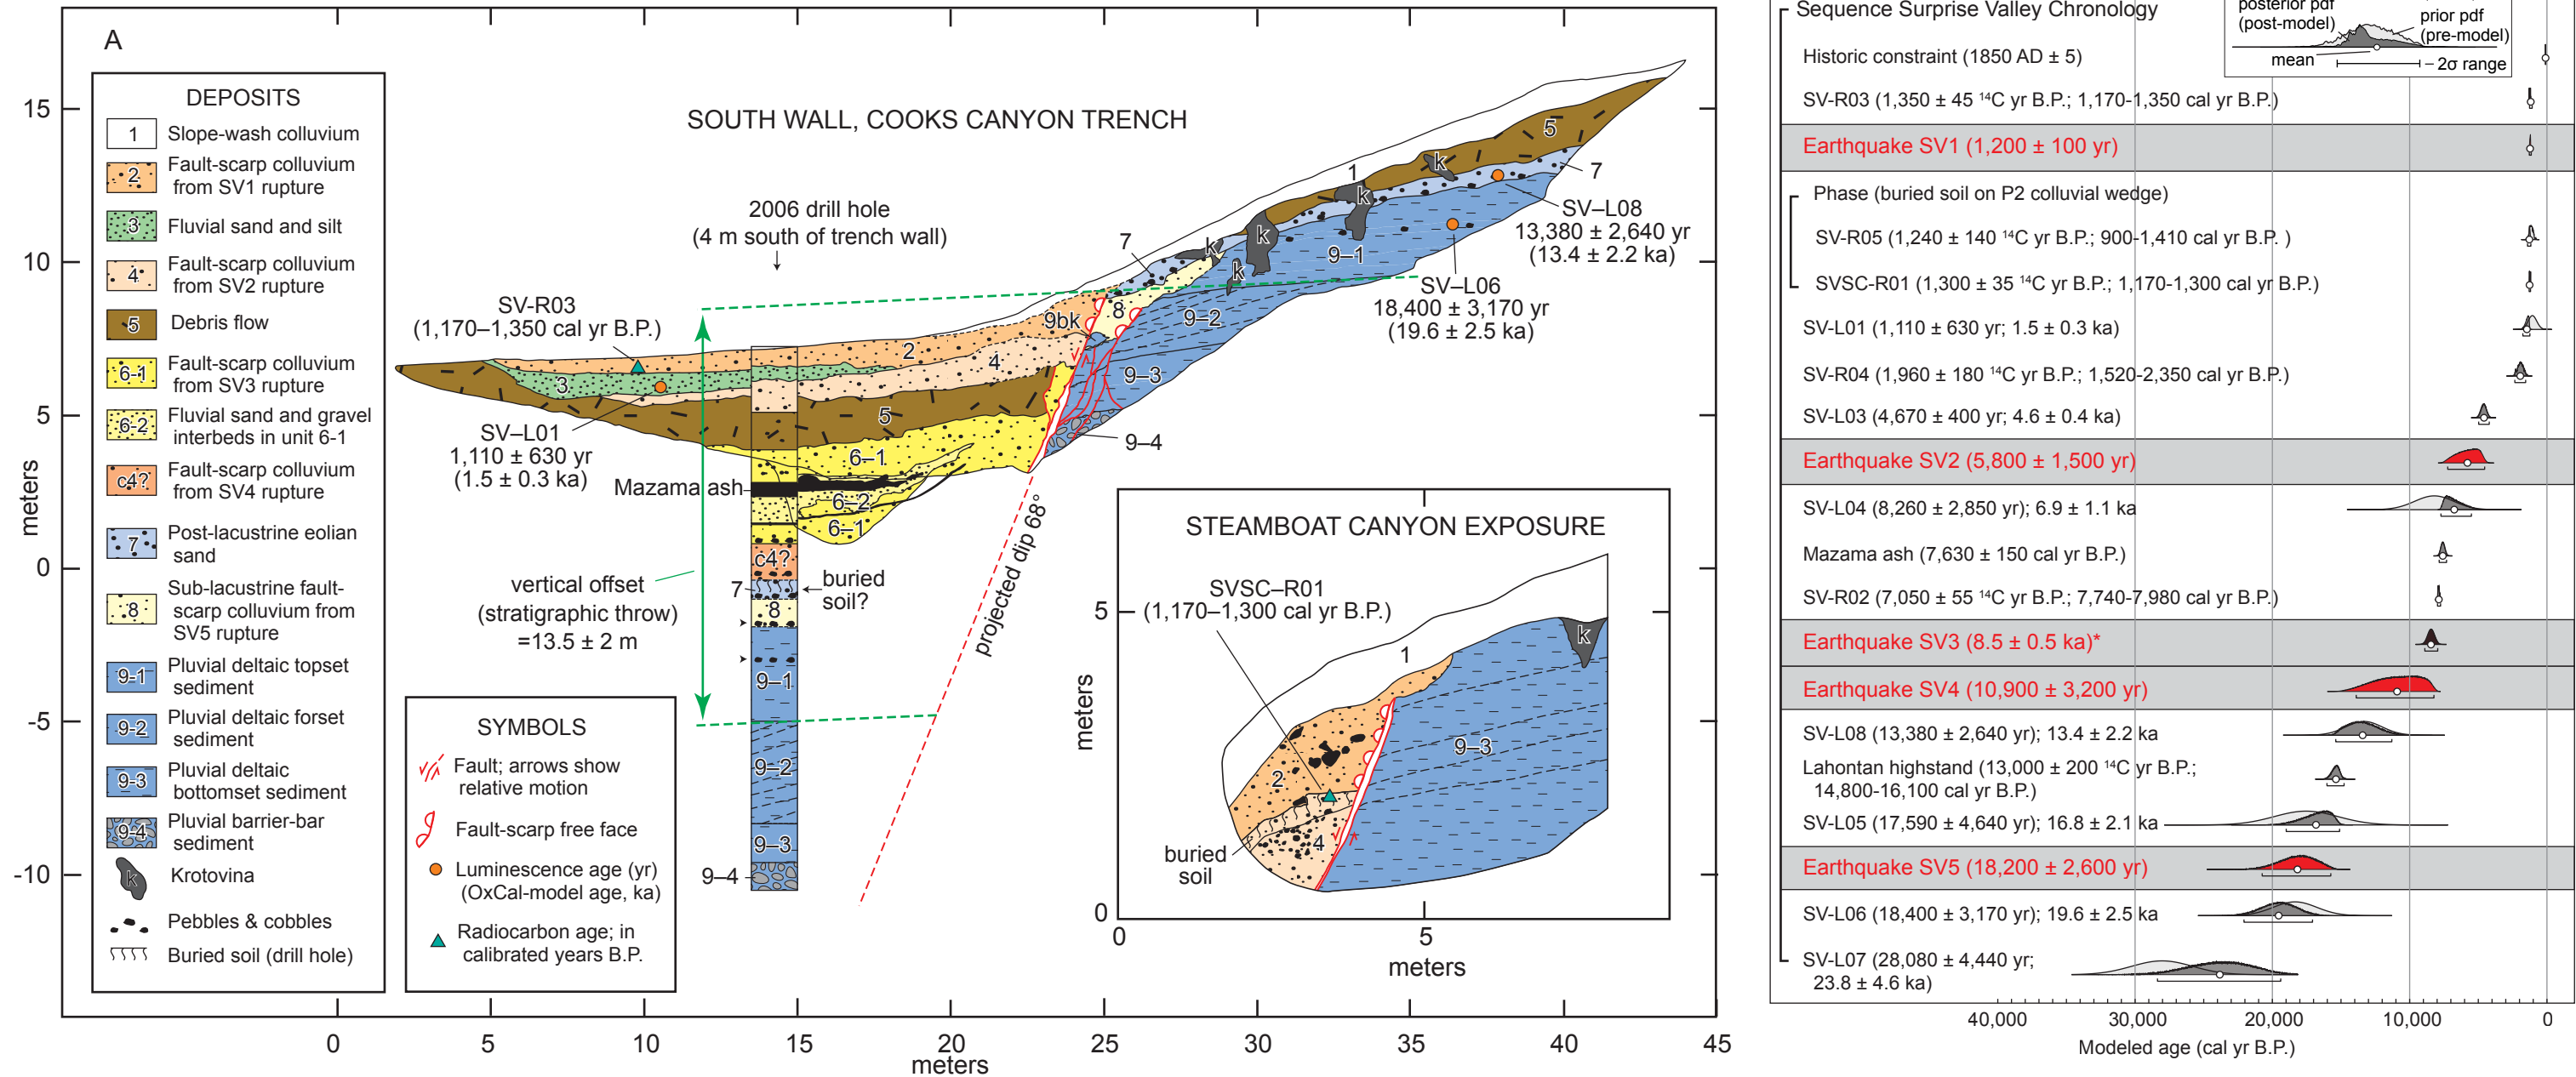

The paleoseismology of the Surprise Valley fault is described in detail by Personius et al. (2007, 2009). Data from a trench and borehole at the Cooks Canyon site and from a natural exposure at the Steamboat Canyon site yielded evidence for 5 surface-rupturing earthquakes since ~18 ka (Fig. A; modified from Fig 4 of Personius et al., 2009). The vertical stratigraphic offset of distinctive facies of the faulted deltaic complex at Cooks Canyon is 13.5 ± 2 m (estimated 2σ uncertainties) dated to ~18 ka (Personius et al., 2009; Ibarra et al., 2014); additional slip of ~1.5 m on synthetic fault scarps on the Valley floor (Hedel, 1980, 1984; Bryant, 1990) yields a combined vertical slip of 15 ± 2 m since deposition of the deltaic complex; topographic profiles on scarps across similar-aged deposits indicate slip of similar magnitude at several other locations along the fault zone (Personius et al., 2007). If the paleoseismic record from the Cooks canyon trench is complete, then the five dated surface ruptures averaged ~2.7 m per earthquake. The timing of these earthquakes is constrained by radiocarbon, luminescence, and correlated tephra ages, with the most-recent earthquake well constrained at both the Cooks Canyon and Steamboat Canyon sites at ~1.2 ± 0.1 ka (Fig. B; modified from Figure 6 of Personius et al., 2009).

References Cited

Bronk Ramsey, C., 2009, Bayesian analysis of radiocarbon dates: Radiocarbon, v. 51, no. 1, p. 337–360.

Bronk Ramsey, C., and Lee, S., 2013, Recent and planned developments of the program OxCal: Radiocarbon, v. 55, no. 2–3, p.720-730.

Bryant, W.A., 1990, Surprise Valley and related faults, Lassen and Modoc counties, in California Division of Mines and Geology Fault Evaluation Report, v. 217, 17 p.

Hedel, C.W., 1980, Late Quaternary faulting in western Surprise Valley, Modoc County, California [Master's thesis]: San Jose, California, San Jose State University, 113 p.

Hedel, C.W., 1984, Maps showing geomorphic and geologic evidence for late Quaternary displacement along the Surprise Valley and associated faults, Modoc County, California: U.S. Geological Survey Miscellaneous Field Studies Map MF-1429.

Personius, S.F., Crone, A.J., Machette, M.N., Lidke, D.J., Bradley, L.-A., and Mahan, S.A., (2007b), Logs and scarp data from a paleoseismic investigation of the Surprise Valley fault zone, Modoc County, California: U.S. Geological Survey Scientific Investigations Map 2983. Available at <http://pubs.usgs.gov/sim/2983/>.

Personius, S.F., Crone, A.J., Machette, M.N., Mahan, S.A., and Lidke, D.J., 2009, Moderate rates of late Quaternary slip along the northwestern margin of the Basin and Range Province, Surprise Valley fault, northeastern California: Journal of Geophysical Research, v. 114, 17 p., doi:10.1029/2008jb006164.

Reimer, P.J., Bard, E., Bayliss, A., Beck, J.W., Blackwell, P.G., Ramsey, C.B., Buck, C.E., Cheng, H., Edwards, R.L., Friedrich, M. and Grootes, P.M., 2013, IntCal13 and Marine13 radiocarbon age calibration curves 0–50,000 years cal BP: Radiocarbon, v. 55, no. 4, p.1869-1887.
